# Supplementary material for: Compromised antigen binding and signaling interfere with bispecific CD19 and CD79a chimeric antigen receptor function
Source: PubMed Central journal article supplement — Blood Adv. 2022 Dec 7;7(12):2718–30. doi: 10.1182/bloodadvances.2022008559 (PMC10275707; doi:10.1182/bloodadvances.2022008559), 2022-12-07
Supplement: BLOODA_ADV-2022-008559-mmc1.pdf [file BLOODA_ADV-2022-008559-mmc1.pdf]

A

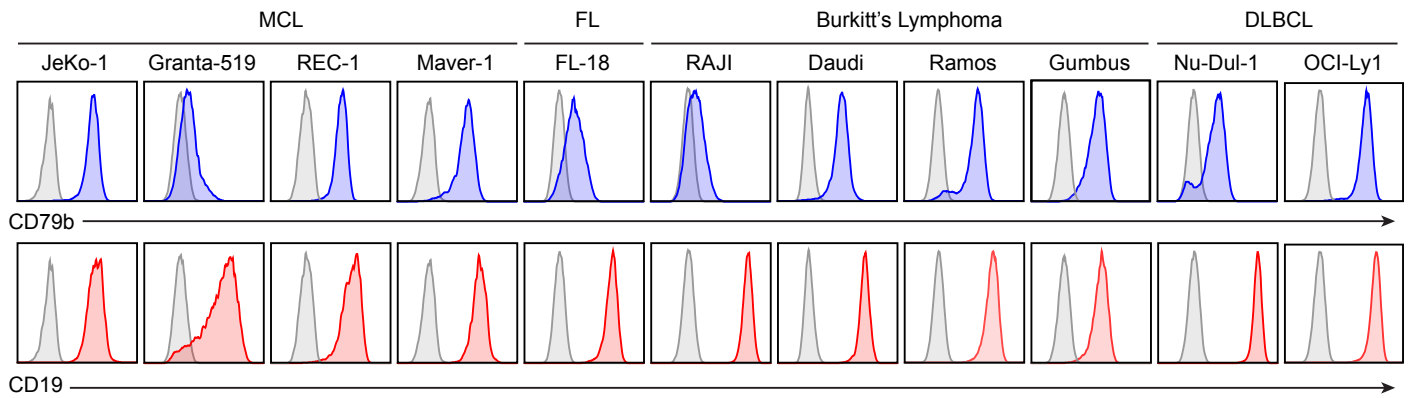

B

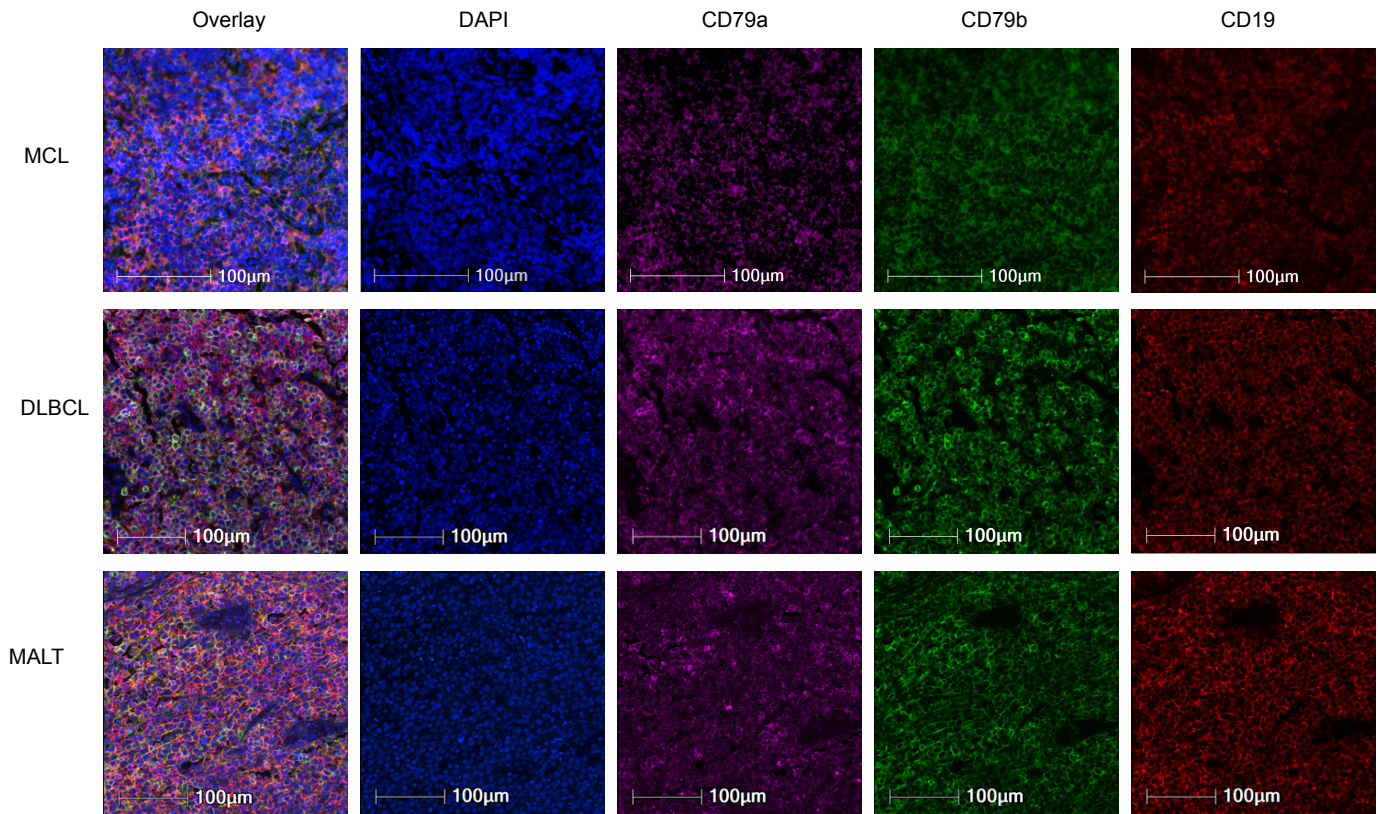

**Supplemental Figure 1. CD79ab and CD19 expression on tumor cell lines and primary specimens.** A. Flow cytometric evaluation of CD79b and CD19 expression on the indicated tumor cell lines. MCL= mantle cell lymphoma, FL= follicular lymphoma, Burkitt's = Burkitt's lymphoma, DLBCL = Diffuse Large B-cell Lymphoma and MALT = lymphoma of the mucosa-associated lymphoid tissue. B. Representative fluorescent images of IHC staining of CD79a, Cd79b, and CD19 on lymphoma subtypes.

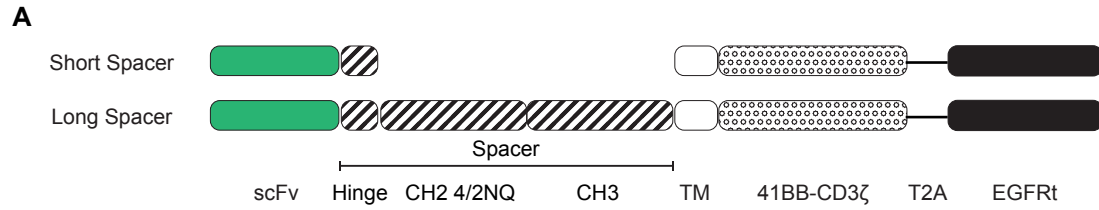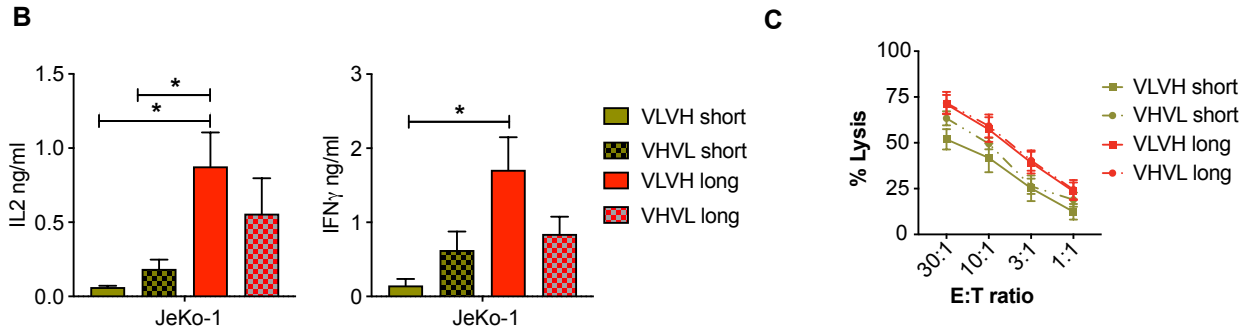

**Supplemental Figure 2. CD79b CAR designed with a long spacer is functionally more active than with a short spacer.** A. Schematic of CAR constructs with long or short spacers. B. IL-2 and IFN $\gamma$  production by CAR-T cells measured by ELISA after co-culture with JeKo-1 tumor cells. Data shown are from three independent experiments performed with different donors. C. Lysis of  $^{51}\text{Cr}$  labeled JeKo-1 tumor cells by CAR-T cells prepared from two different donors. VLVH indicates the variable light domain was encoded in the N-terminal position relative to the variable heavy domain and vice versa for VHVL. \* $P < 0.05$  were calculated with one-way ANOVA Tukey's multiple comparisons test. All error bars are S.E.M.

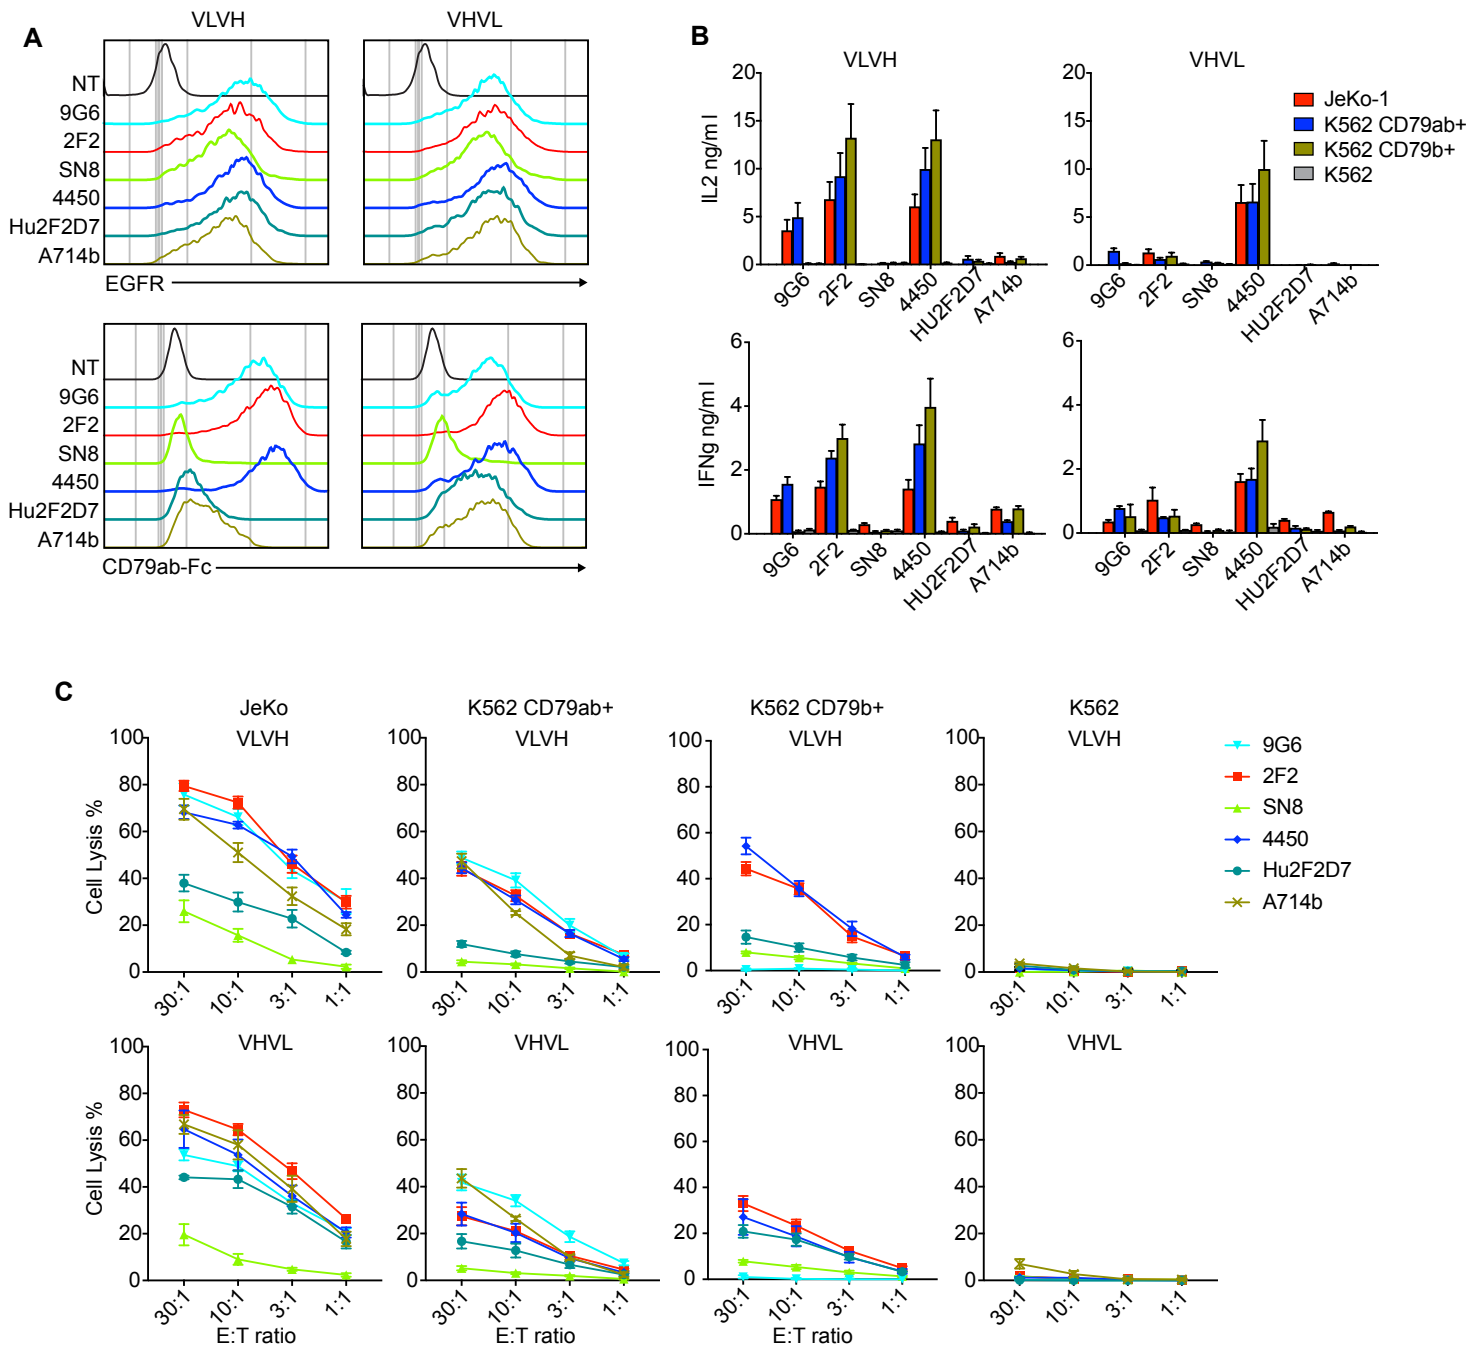

**Supplemental Figure 3. 2F2 and 9G6 scFvs cloned in the VLVH orientation provide potent CD79b or CD79a CARs, respectively.** A. EGFR<sup>t</sup> (transduction marker) expression (top panels) and binding of CD79ab-Fc (bottom panels) by CD8<sup>+</sup> CAR-T cells assayed by flow cytometry. Data is representative of results from three donors. Left and right panels showing staining of T cells expressing CARs in the VHVL or VLVH orientation, respectively. B. Lysis of <sup>51</sup>Cr labelled tumor cells by CD79a or CD79b CAR-T cells at various effector to tumor ratios. Data are means  $\pm$  S.E.M of two independent experiments. C. IL2 (top) and IFN $\gamma$  (bottom) production by CAR T cells cultured with tumor cells expressing CD79a and/or CD79b measured by ELISA. Data are means  $\pm$  S.E.M of three independent experiments.

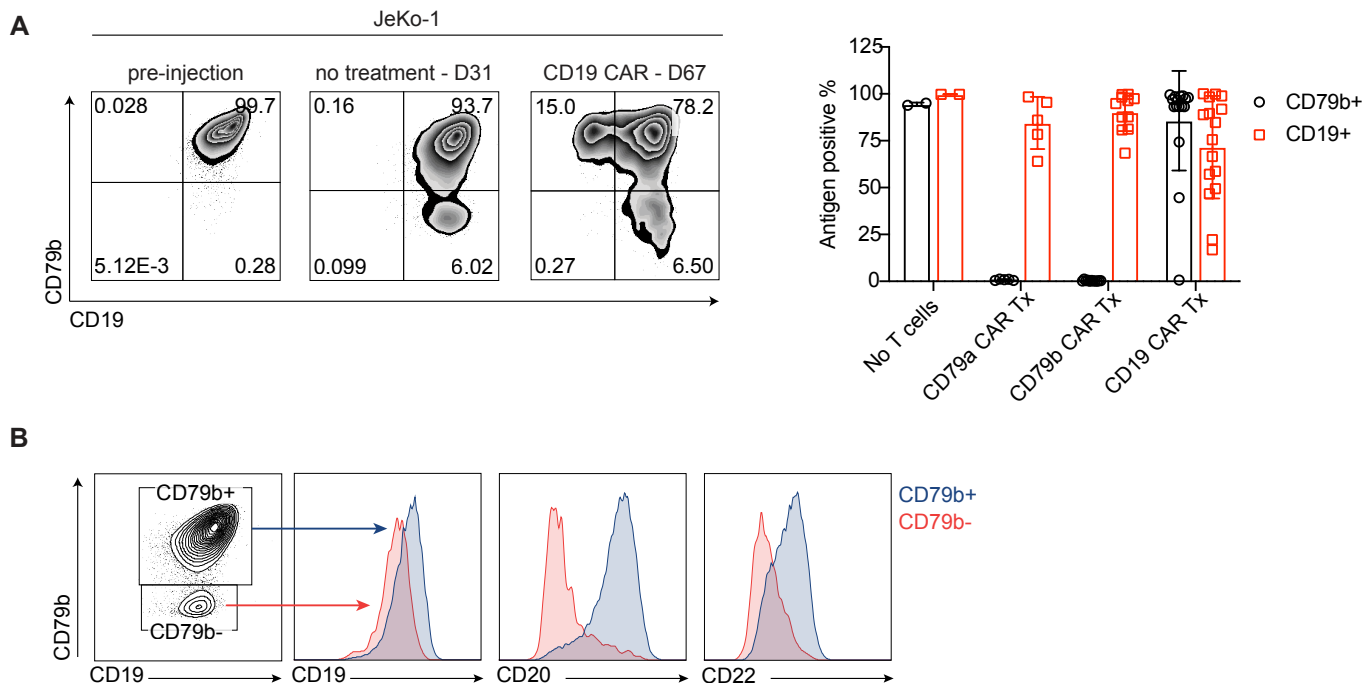

**Supplemental Figure 4. CD79b loss on JeKo-1 tumor cells in vivo occurs in a minor fraction of tumor cells in untreated and CD19 CAR T cell treated mice and is associated with downregulation of other B cell markers.** A. Left panels: Flow cytometry plots showing CD19 and CD79b staining of JeKo-1 cells from BM suspensions of mice that were untreated or treated with CD19 CAR-T cells. Day of euthanasia is shown above the plots. Right panel: Bar graphs are quantification of tumor cells that expressed CD79b or CD19 for mice that were untreated or treated with the indicated CAR T cells. Each data point represents samples from individual mice at the time of euthanasia. Data shown are collected from multiple experiments done with different doses of CAR T cells and are not solely from the survival experiment shown in Figure 2. B. Histograms showing CD19, CD20, and CD22 expression on CD79b positive and negative JeKo-1 cells isolated from BM of treated mice.



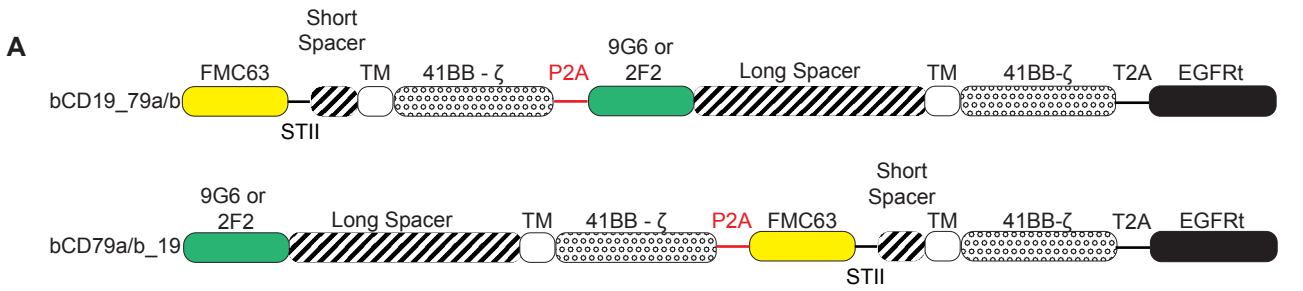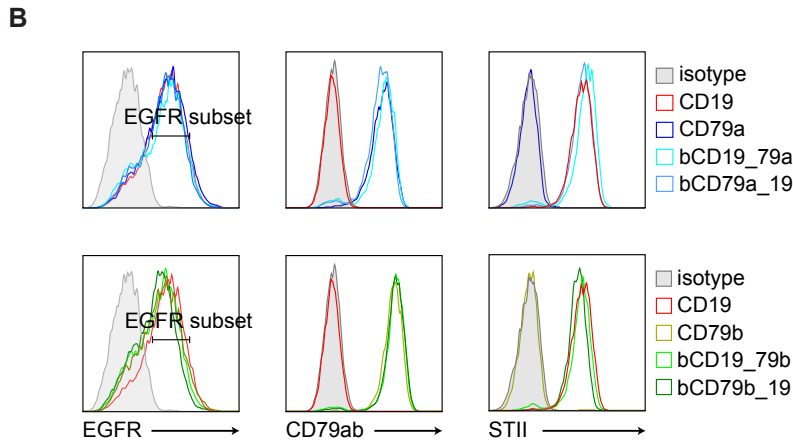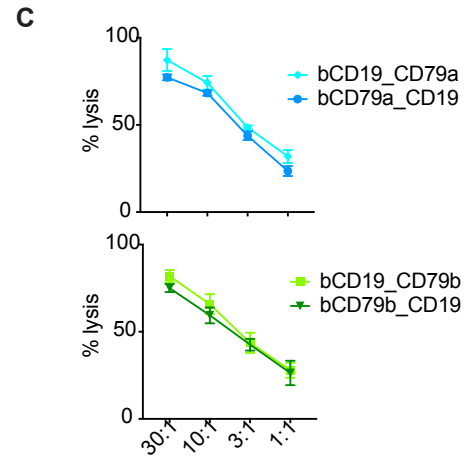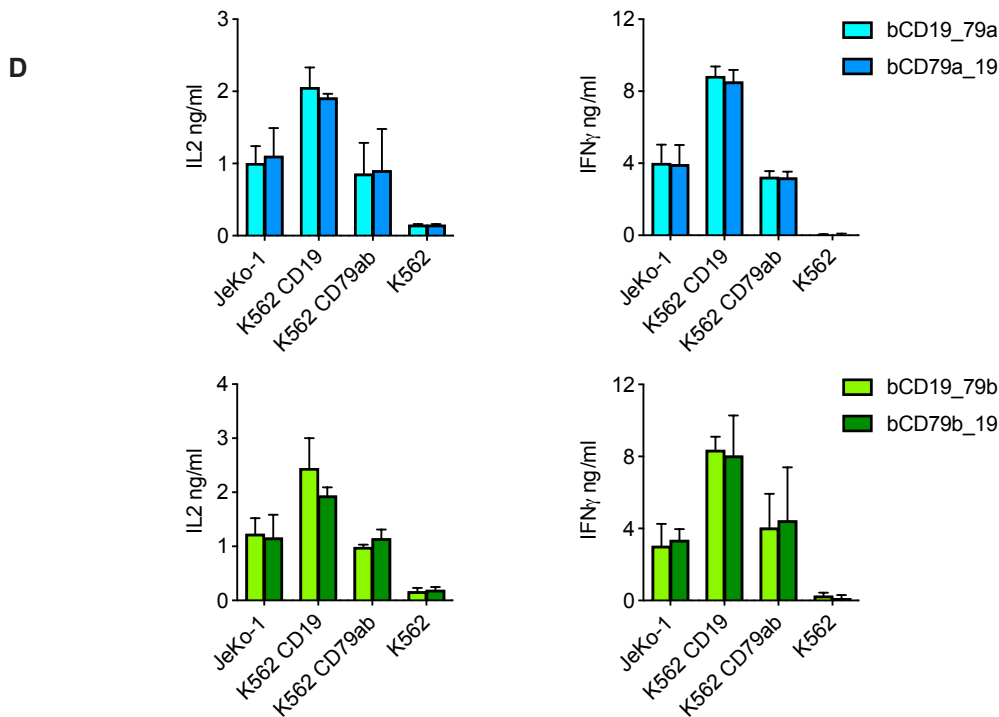

**Supplemental Figure 5. The order of which the CARs are encoded within the bicistronic construct does not impact CAR expression or function.** A. Schematics of bicistronic CAR constructs. B. CAR expression as measured by CD79ab-Fc binding and STII staining on EGFRt<sup>+</sup> sorted cells. C. Lysis of JeKo-1 tumor cells measured by <sup>51</sup>Cr release. D. CAR-T cell IL-2 and IFN $\gamma$  production measured by ELISA after coculture of CAR-T cells with the indicated tumor cell lines. Data are means $\pm$  S.E.M from two independent experiments.

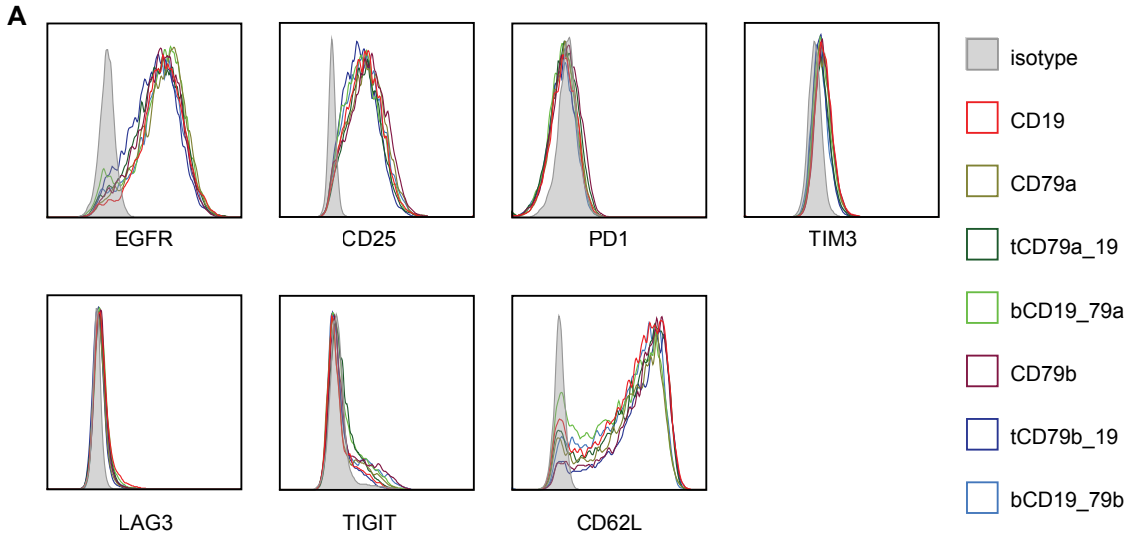

**Supplemental Figure 6. Tandem and bicistronic CAR-T cells have similar cell surface phenotype as monospecific CAR-T cells at the end of culture.** Flow cytometric histograms of EGFRt+ sorted CAR-T cells on day 14 post transduction for the indicated cell surface molecules.

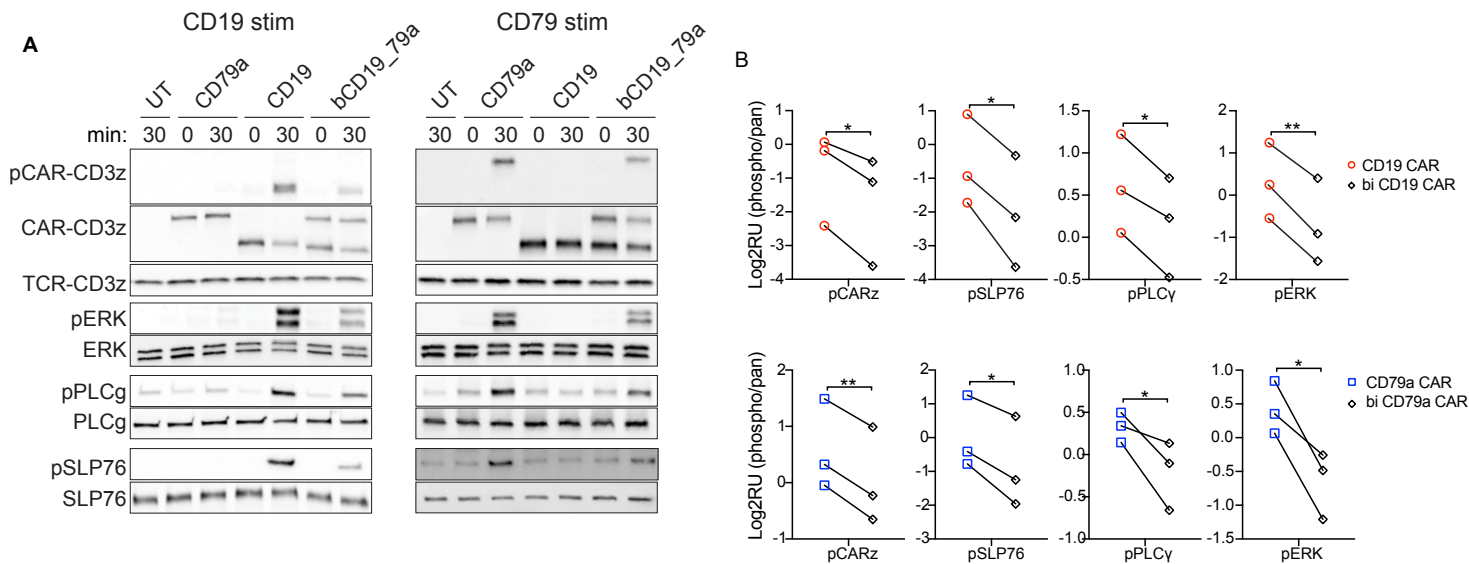

**Supplemental Figure 7. Expression of CD79b and CD19 in JeKo-1 cells in which CD79b or CD19 were edited by CRISPR.** Flow cytometric histograms of Cd79b and CD19 staining on Jeko-1, JeKo-1CD19- and JeKo-1CD79ab- cells.
